# Supplementary material
Source: bioRxiv or medRxiv preprint supplement (https://www.biorxiv.org/highwire/filestream/55449/field_highwire_adjunct_files/2/183376-3.pdf)

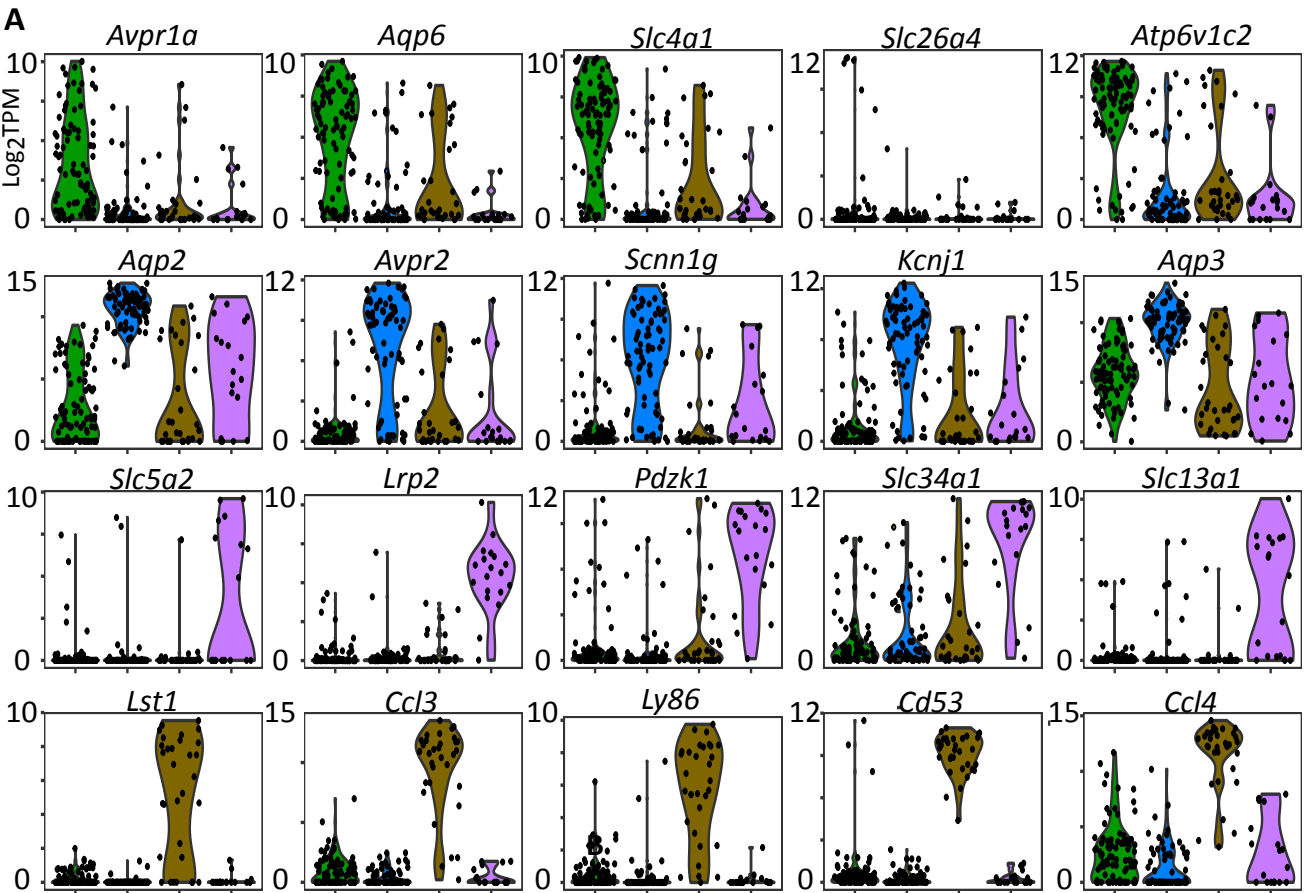

**B**

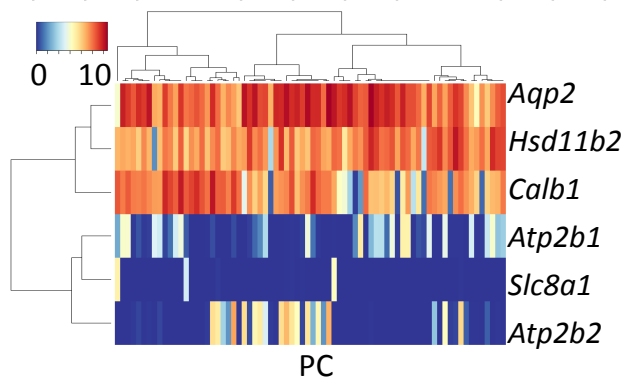

Supplement: Supplementary file [file 183376-3.pdf]
